# Supplementary material for: Improved plaque assay for human coronaviruses 229E and OC43
Source: PeerJ journal article supplement (doi:10.7717/peerj.10639), 2020-12-21

Mv1Lu cell control

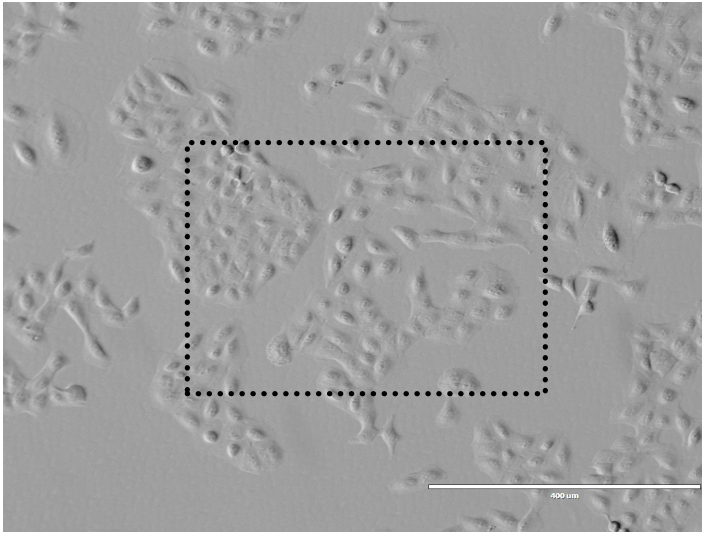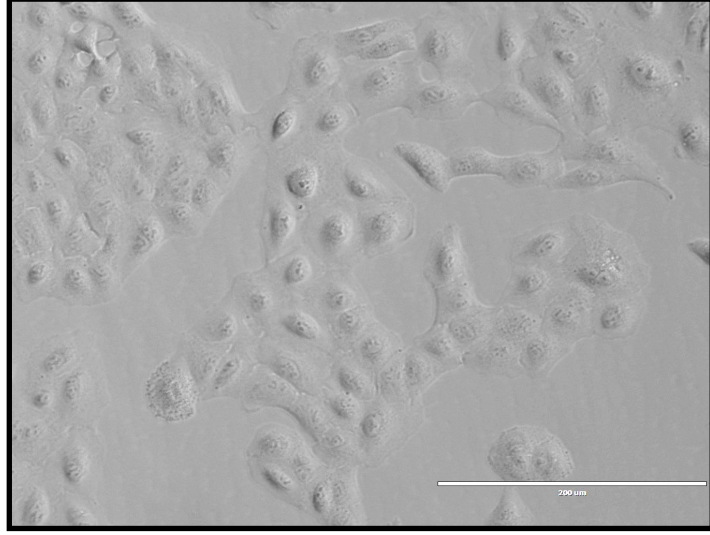

229E-Mv1Lu Day 6

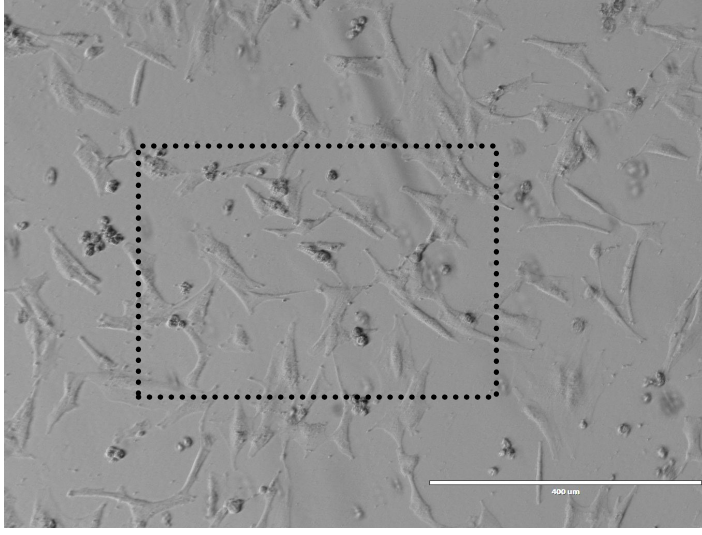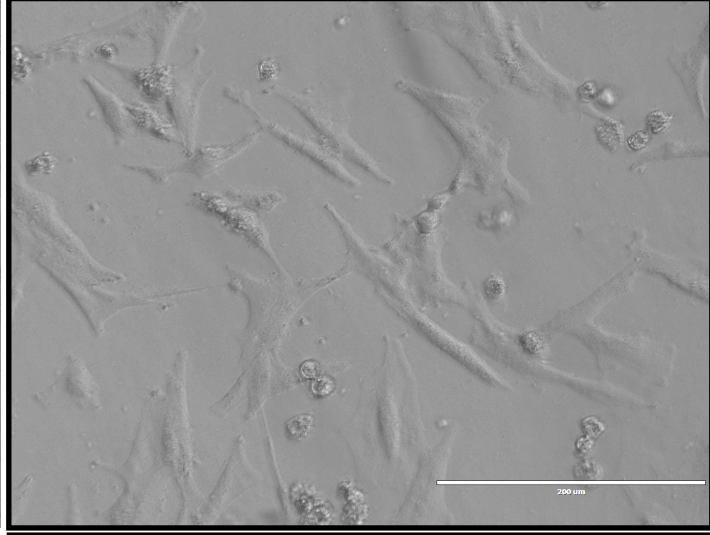

MRC5 cell ctrl

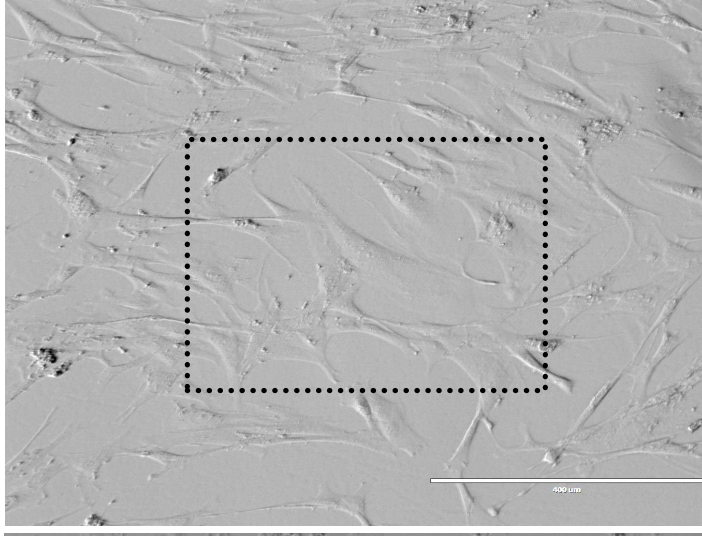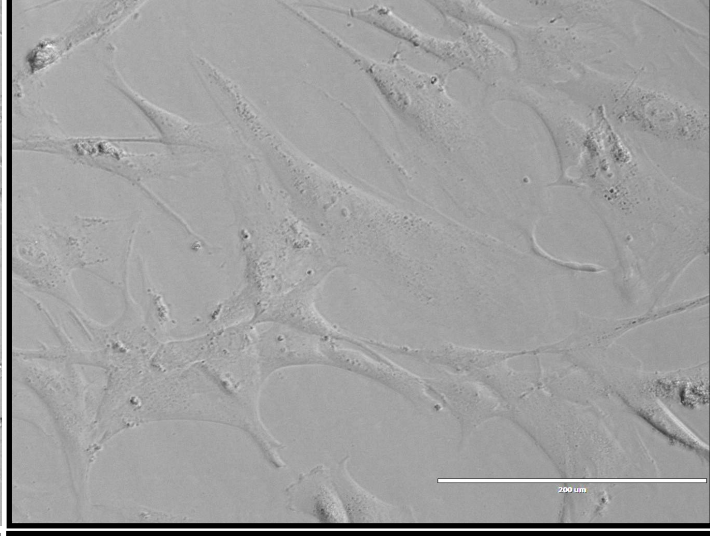

229E-MRC5 Day 3

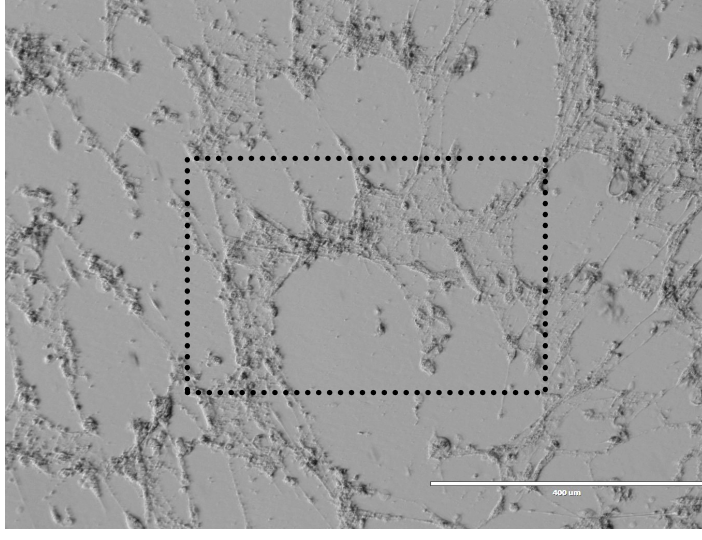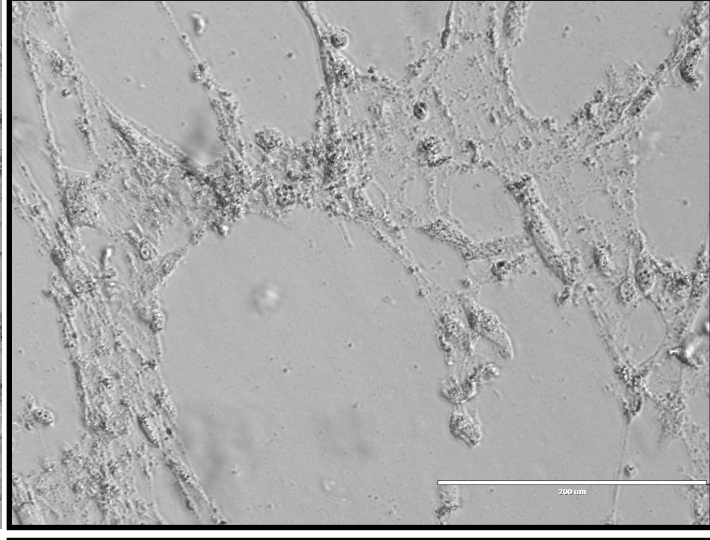

HCT-8 cell control

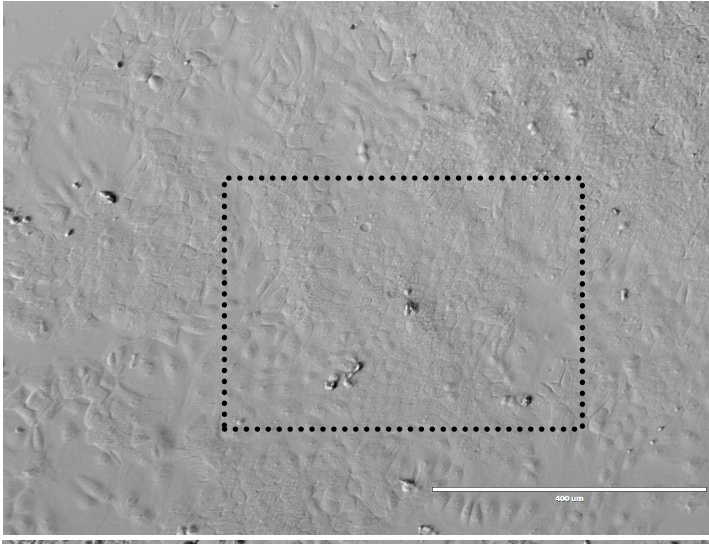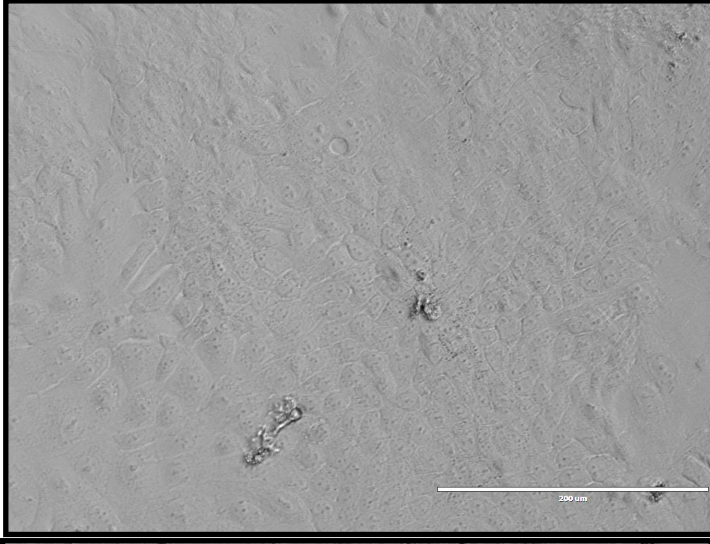

OC43-HCT-8 Day 2

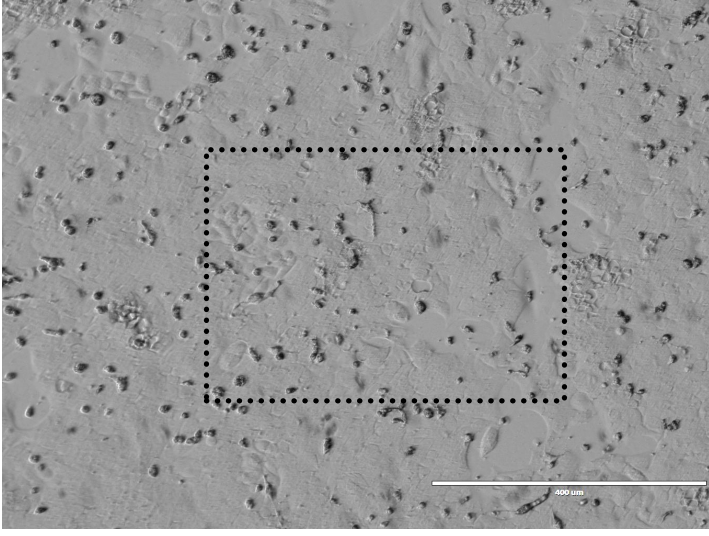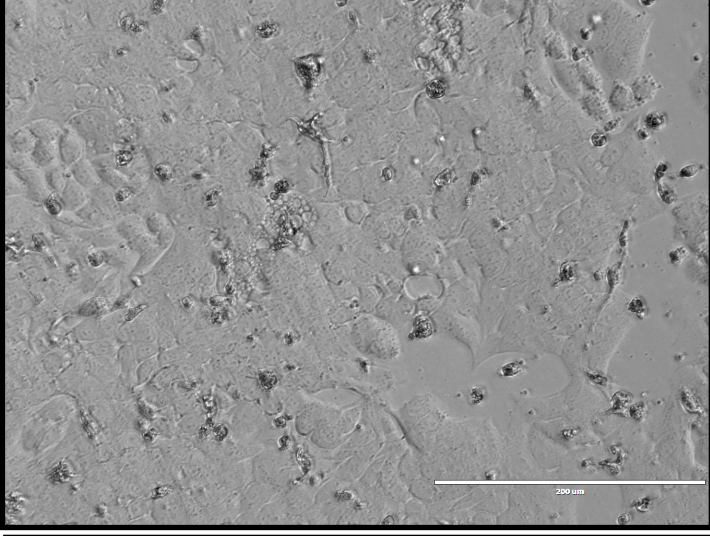

OC43-HCT-8 Day 3

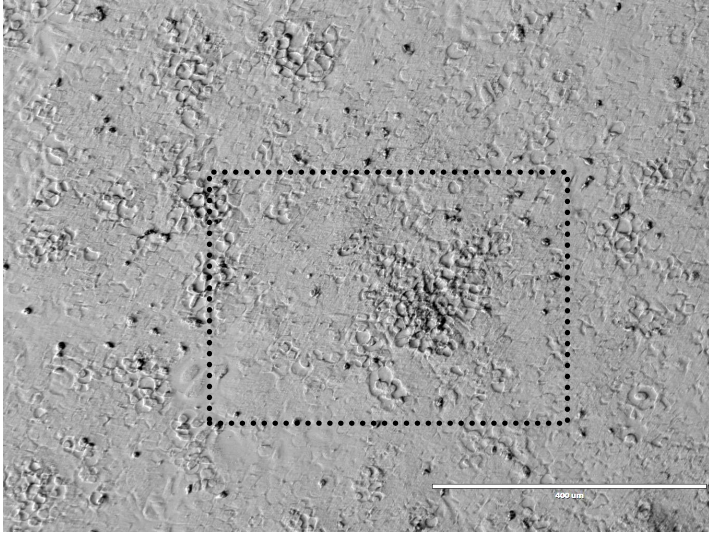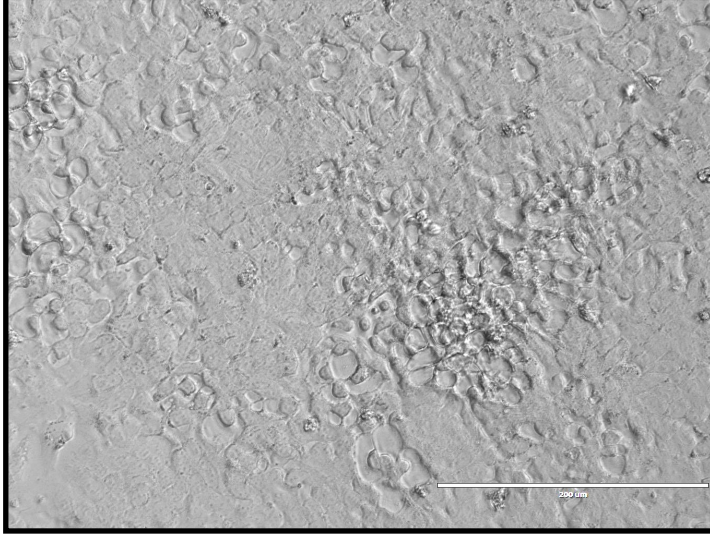

OC43 -HCT-8 Day 6

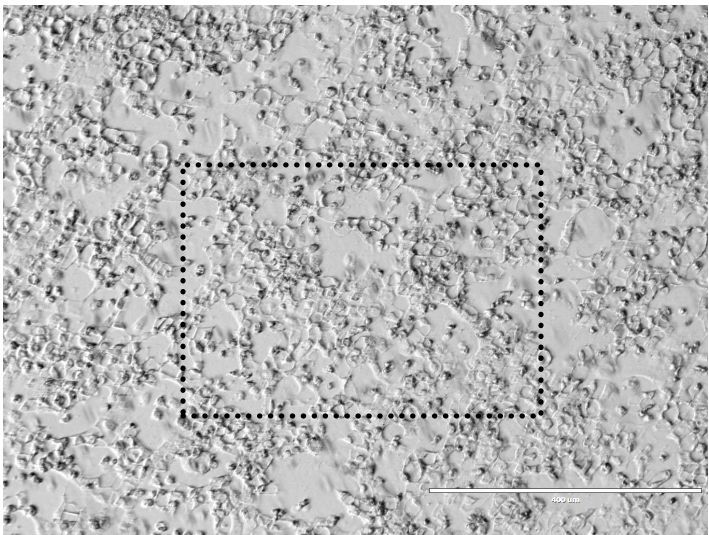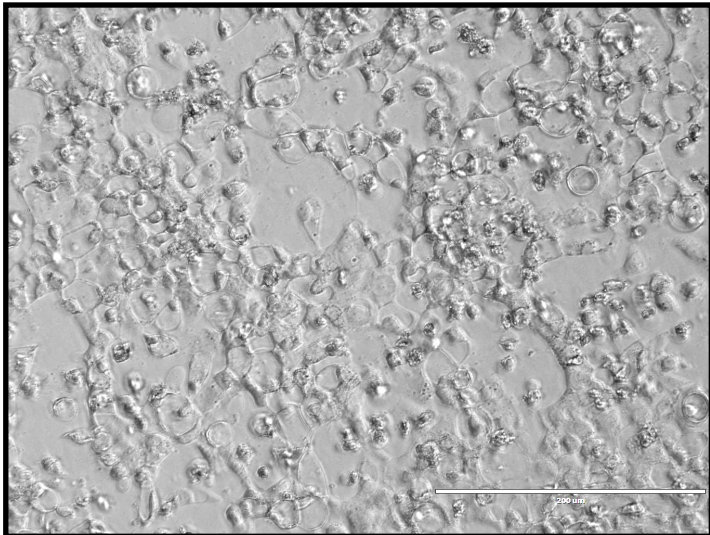

Caco-2 cell control

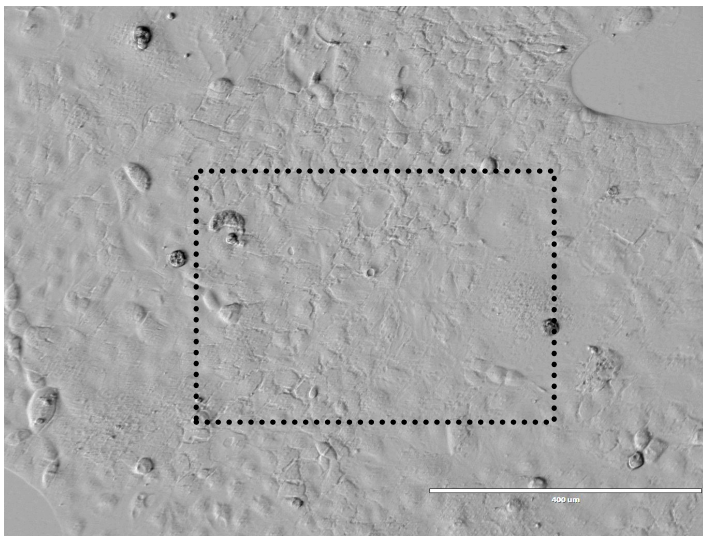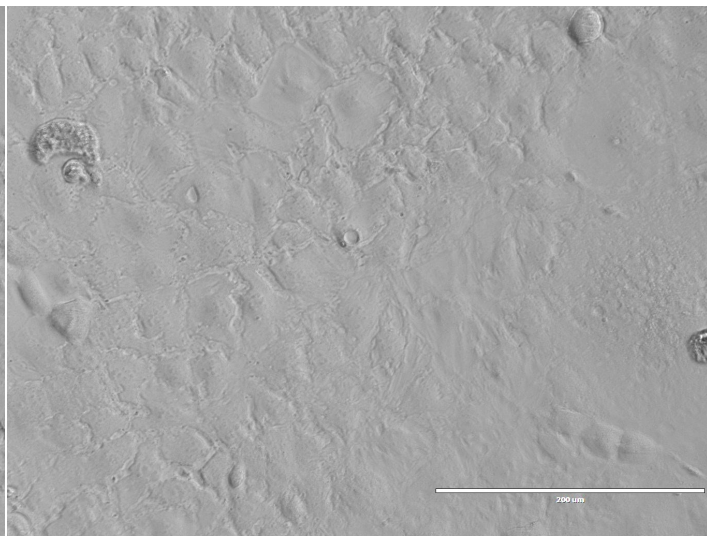

Caco-2+OC43 Day 9

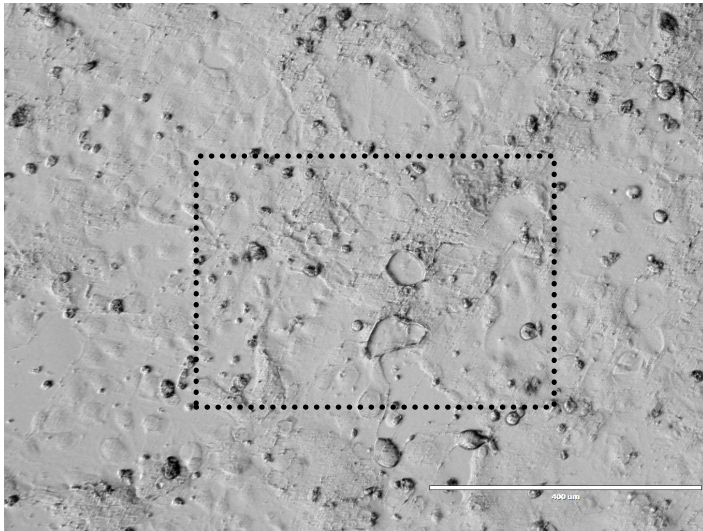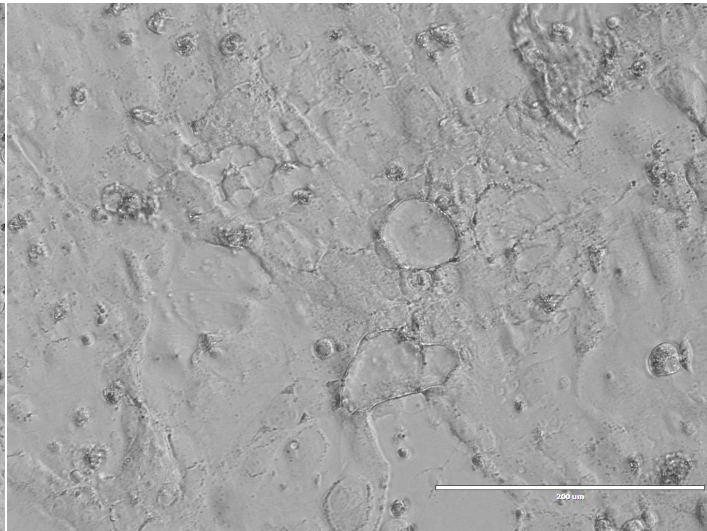

LLC-MK2 cell control

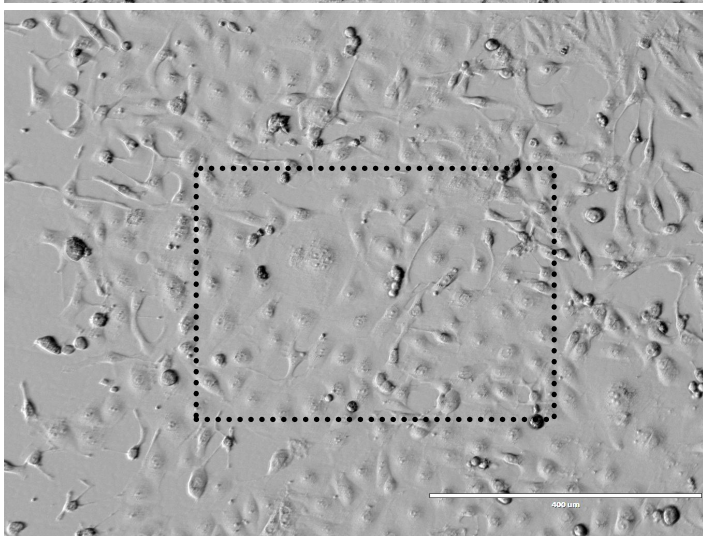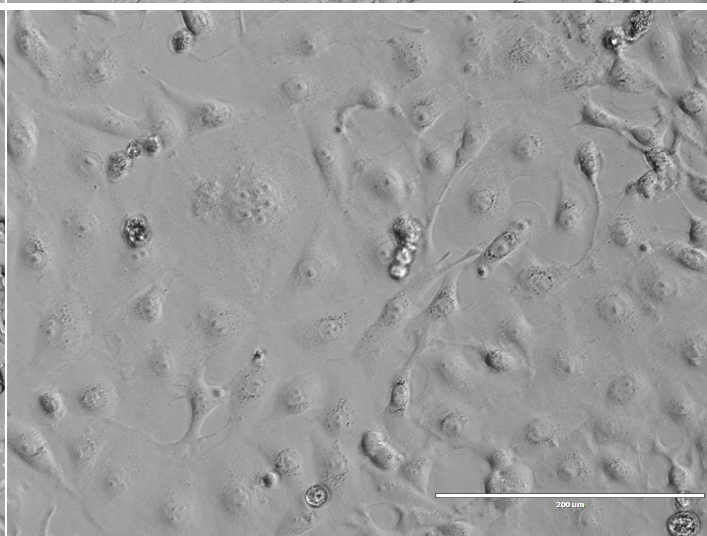

LLC-MK2-NL63 Day3

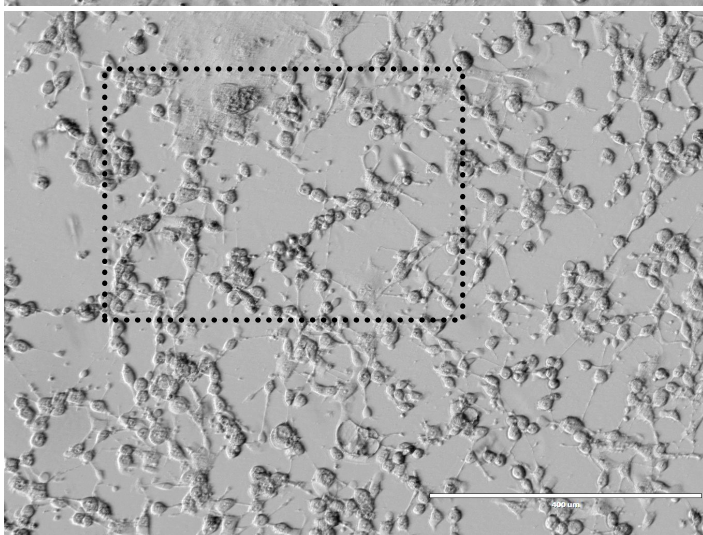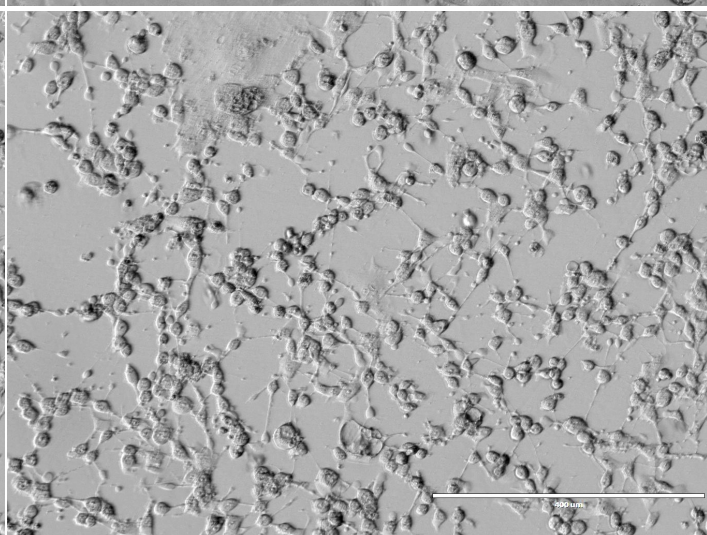

Supplement: Raw_data-Cell_images_after_CoV_infections.pdf [file Raw_data-Cell_images_after_CoV_infections.pdf]
