# Supplementary material for: Improved plaque assay for human coronaviruses 229E and OC43
Source: PeerJ journal article supplement (doi:10.7717/peerj.10639), 2020-12-21

Mv1Lu cells can be used in a 12 well plate for titrating OC43 viral titer.

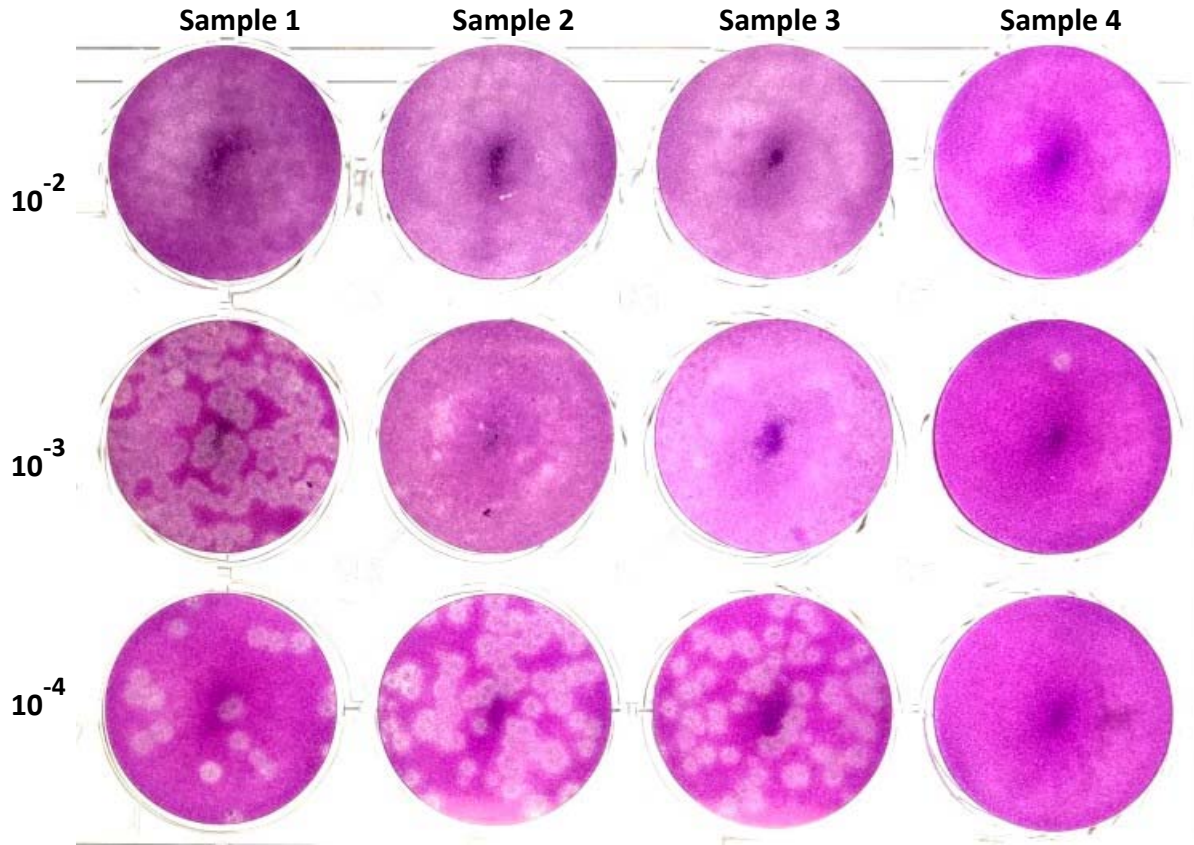

Supplement: Raw_data-Mv1Lu_in_12_well_plates.pdf [file Raw_data-Mv1Lu_in_12_well_plates.pdf]
